# Supplementary material
Source: PubMed Central journal article supplement (PMC4331242)
Supplement: NIHMS653297-supplement-Supporting_Information.pdf [file NIHMS653297-supplement-Supporting_Information.pdf]

# **Online SERS Detection and Characterization of Eight Biologically-Active Peptides Separated by Capillary Zone Electrophoresis**

Pierre Negri, Scott A. Sarver, Nicole M. Schiavone, Norman J. Dovichi, and Zachary D. Schultz\*

Department of Chemistry and Biochemistry, University of Notre Dame, Notre Dame, IN 46556

\*Corresponding Author email: Schultz.41@nd.edu

## **Abstract**

This supplement contains a description of the CZE-ESI-MS experiments, discussion of the results, Figures S1 and S2, and Tables S1-S9. Figure S1 shows (A) the total and (B) the extracted ion electropherograms of the eight peptides resulting from the CZE-ESI-MS experiments. Figure S2 shows the mass spectra of the eight detected peptides. Table S1 summarizes the results of the CZE-ESI-MS experiments and lists each peptide, along with the observed  $m/z$ , expected  $m/z$ , sample concentration, and estimated LOD. Also included are tables summarizing the observed vibrational bands with assignments based on literature precedents in the SERS spectra of the eight biologically-active peptides shown in Figure 3. They include assignments for the bands observed in the SERS spectrum of Laminin Pentapeptide (Table S2), Bombesin (Table S3), Angiotensin III (Table S4), Somatostatin (Table S5), Amyloid  $\beta$ -Protein (Table S6), Angiotensin I (Table S7), Angiotensin II (Table S8), and Substance P (Table S9).

### CZE-ESI-MS Confirmation of Peptide Migration.

A 50 cm (72  $\mu\text{m}$  i.d., 143  $\mu\text{m}$  o.d.) uncoated fused silica capillary (Polymicro Technologies, Phoenix, AZ) was coupled to an Orbitrap Velos mass spectrometer (Thermo Fisher Scientific) via an electrokinetically pumped sheath-flow electrospray interface.<sup>1</sup> The capillary dimensions and buffer conditions were matched to those used in the CZE-SERS experiments and were not optimized for MS detection. The electrospray ionization (ESI) emitter was generated from a borosilicate glass capillary and pulled (Sutter Instrument, Novato, CA) to an 8  $\mu\text{m}$  i.d. tip. The same separation buffer was used for the CZE-ESI-MS experiments: 10 mM ammonium bicarbonate (pH 8). The sheath liquid was a mixture of 0.1% formic acid and 10% methanol in water to facilitate the electrospray. Voltages were provided by two Spellman CZE 1000R power supplies controlled by a custom LabView program. Electrospray and separation voltages were 1.2 kV and 10.2 kV, respectively, resulting in a 200  $\text{V cm}^{-1}$  separation. The sample was introduced into the separation capillary using a 2 s pressure injection. The injection block was identical to that used in the CZE-SERS experiments.

Full MS scans were obtained in the Orbitrap mass analyzer at a resolution of 70,000 (at  $m/z$  200) over a range of 380-2000  $m/z$ . The maximum allowed ion accumulation time was 250 ms, and the automatic gain control target was  $1.00 \times 10^6$ . Extracted ion and total ion electropherograms were constructed from the data using MATLAB. The electropherograms were smoothed using a 7 point Savitsky-Golay smoothing algorithm and background subtracted using the built-in baseline correction algorithm in MATLAB (msbackadj).

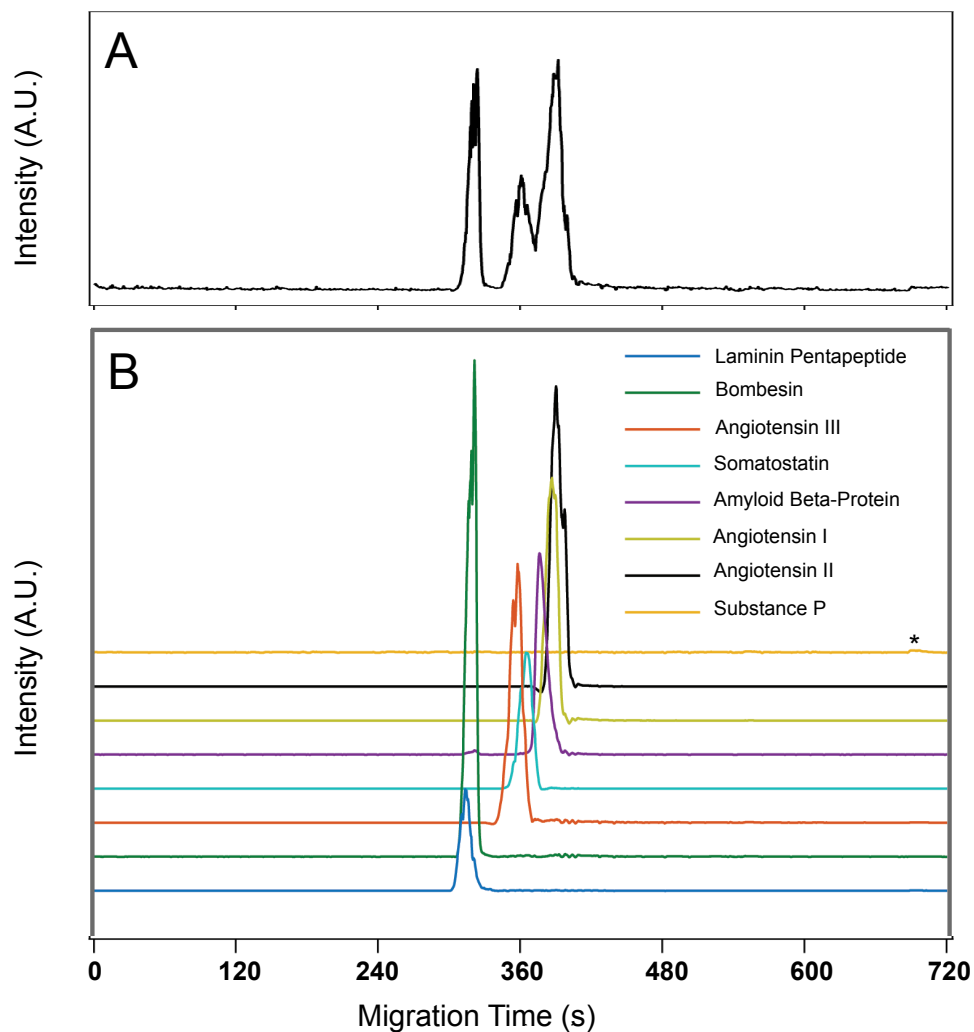

**Figure S1.** (A) Total and (B) extracted ion electropherograms of the eight peptides resulting from the CZE-ESI-MS experiment showing detection of Laminin Pentapeptide ( $m/z = 594.3367$ ) at  $t_{m1} = 318$  s, Bombesin ( $m/z = 810.4175$ ) at  $t_{m2} = 324$  s, Angiotensin III ( $m/z = 466.2615$ ) at  $t_{m3} = 361.2$  s, Somatostatin ( $m/z = 819.3678$ ) at  $t_{m5} = 378$  s, Amyloid  $\beta$ -Protein ( $m/z = 530.7956$ ) at  $t_{m4} = 367.2$  s, Angiotensin I ( $m/z = 648.8478$ ) at  $t_{m6} = 388.2$  s, Angiotensin II ( $m/z = 523.775$ ) at  $t_{m7} = 391.8$  s, and Substance P ( $m/z = 674.3733$ ) at  $t_{m8} = 695.4$  s as noted by the asterisk. The peptide concentration in this mixture is  $5.0 \times 10^{-6}$  M.

CZE-ESI-MS confirmed the identity, the elution order and the migration times of the peptides observed in the CZE-SERS experiments. The capillary dimensions and separation buffer composition were kept identical to those used in the optimized SERS experiments to provide a direct comparison. However, the large inner diameter of the capillary required a lower separation voltage (10.2 kV for CZE-ESI-MS vs. 15 kV for CZE-SERS) in the mass spectrometry experiment, which produced slightly longer migration times when compared to the CZE-SERS experiments; however, the migration order was unaffected. Attempting to increase the voltages to match those used in the CZE-SERS experiments resulted in a breakdown of the electrospray ionization due to the high conductivity of the larger diameter capillary. The total ion count electropherogram in Figure S1A shows co-migration of many of the peptides. This much poorer resolution is in contrast with the SERS and the TPE electropherograms shown in Figure 1. Interestingly, Substance P was detected late in the CZE-ESI-MS experiments and the peak generated has significantly lower signal to noise than the other peptides (Figure S1B). This effect was consistently observed in replicate MS runs. This low ionization efficiency is attributed to the existence of two basic amino acid residues in Substance P (R and K). The experiment was run in a carbonate buffer (PH=8) compatible for both ESI-MS and SERS detection, which may affect the ionization efficiency of Substance P relative to other peptides. Using isotachopheresis to pre-concentrate the sample at its isoelectric point enabled MS detection at nanomolar concentrations.<sup>2</sup>

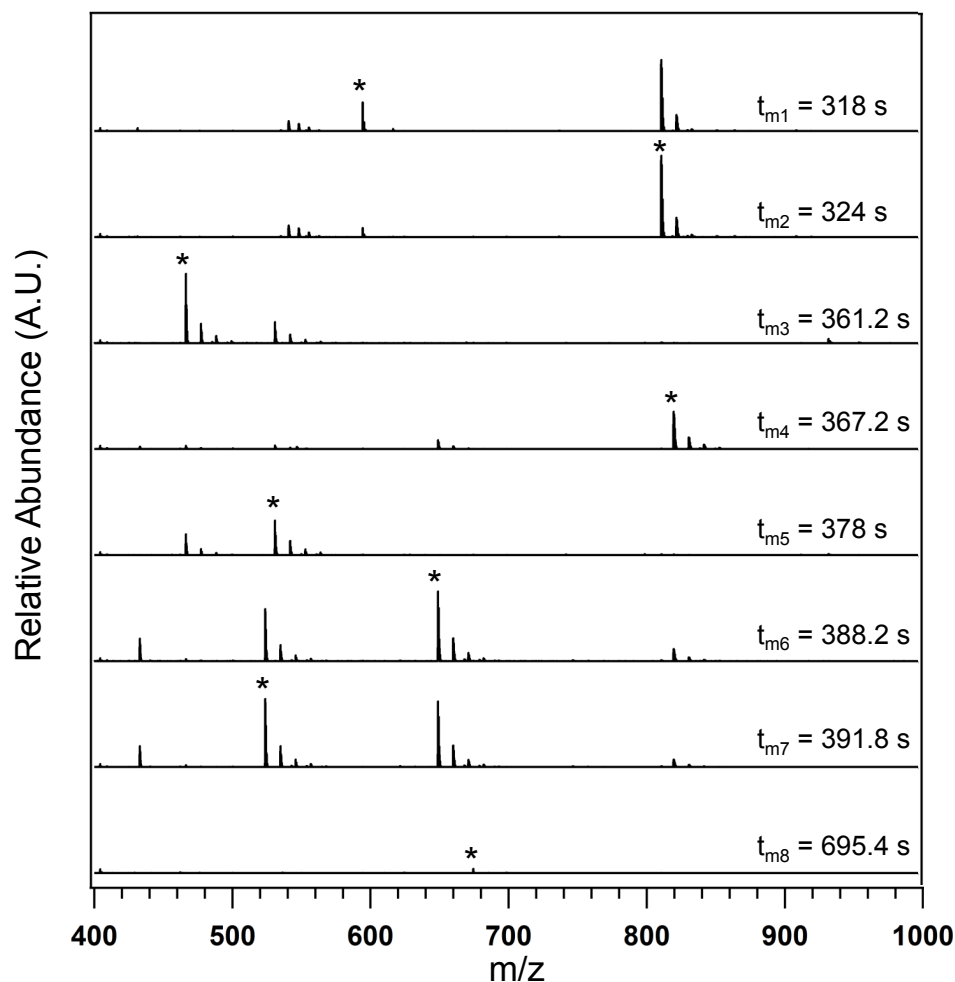

**Figure S2.** Mass spectra of the eight peptides resulting from the CZE-ESI-MS experiments extracted at  $t_{m1} = 318$  s (Laminin Pentapeptide,  $m/z = 594.3367$ ),  $t_{m2} = 324$  s (Bombesin,  $m/z = 810.4175$ ),  $t_{m3} = 361.2$  s (Angiotensin III,  $m/z = 466.2615$ ),  $t_{m4} = 367.2$  s (Somatostatin,  $m/z = 819.3678$ ),  $t_{m5} = 378$  s (Amyloid  $\beta$ -Protein,  $m/z = 530.7956$ ),  $t_{m6} = 388.2$  s (Angiotensin I,  $m/z = 648.8478$ ),  $t_{m7} = 391.8$  s (Angiotensin II,  $m/z = 523.775$ ), and  $t_{m8} = 695.4$  s (Substance P,  $m/z = 674.3733$ ). The asterisks indicate the ions used for identification of each peptide.

**Table S1.** Tabulated results from the CZE-ESI-MS experiment including the observed m/z, predicted m/z, sample concentration, and estimated LOD for each of the eight detected peptides.

| <b>Peptide Name</b>       | <b>S/N</b> | <b>Observed m/z</b> | <b>Predicted m/z</b> | <b>Sample Conc (uM)</b> | <b>Estimated LOD (nM)</b> |
|---------------------------|------------|---------------------|----------------------|-------------------------|---------------------------|
| Laminin Pentapeptide (+1) | 1900       | 594.336             | 594.336              | 5.00                    | 7.7                       |
| Bombesin (+2)             | 2300       | 810.416             | 810.415              | 5.00                    | 6.5                       |
| Angiotensin III (+2)      | 1600       | 466.261             | 466.262              | 5.00                    | 9.7                       |
| Somatostatin (+2)         | 4300       | 819.365             | 819.881              | 5.00                    | 3.5                       |
| Amyloid Beta-Protein (+2) | 4700       | 530.794             | 530.795              | 5.00                    | 3.2                       |
| Angiotensin I (+2)        | 6500       | 648.845             | 648.847              | 5.00                    | 2.3                       |
| Angiotensin II (+2)       | 8199       | 523.774             | 523.775              | 5.00                    | 1.8                       |
| Substance P (+2)          | 5          | 674.3733            | 674.372              | 5.00                    | 3000                      |

**Table S2.** Observed vibrational bands with assignments in the SERS spectra of Laminin

Pentapeptide shown in Figure 5a. Bands allowing identification of this peptide are highlighted in red.

| Peak Position (cm <sup>-1</sup> ) | Proposed Band Assignment                                                                  | AA Contribution |
|-----------------------------------|-------------------------------------------------------------------------------------------|-----------------|
| 693                               | COO <sup>-</sup> deformation <sup>3</sup>                                                 |                 |
| 854                               | Fermi resonance between ring breathing and out-of-plane ring bend overtone <sup>4,5</sup> | Tyr             |
| 1135                              | NH <sub>3</sub> <sup>+</sup> deformation <sup>6</sup>                                     |                 |
| 1204                              | C <sub>β</sub> -C <sub>γ</sub> stretching <sup>7-9</sup>                                  | Tyr             |
| 1249                              | Amide III vibration <sup>10</sup>                                                         |                 |
| 1293                              | CH <sub>2</sub> wagging <sup>6</sup>                                                      |                 |
| 1344                              | C-H deformation <sup>6</sup>                                                              |                 |
| 1361                              | CH <sub>2</sub> scissoring <sup>11</sup>                                                  |                 |
| 1444                              | CH <sub>2</sub> scissoring <sup>12</sup>                                                  |                 |
| 1631                              | Amide I vibration <sup>10,12</sup>                                                        |                 |

**Table S3.** Observed vibrational bands with assignments in the SERS spectra of Bombesin shown in Figure 5b. Bands allowing identification of this peptide are highlighted in red.

| Peak Position (cm <sup>-1</sup> ) | Proposed Band Assignment                               | AA Contribution |
|-----------------------------------|--------------------------------------------------------|-----------------|
| 674                               | C-S stretching <sup>13, 14</sup>                       | Met             |
| 693                               | COO <sup>-</sup> deformation <sup>3</sup>              |                 |
| 843                               | C-C stretching <sup>6</sup>                            |                 |
| 915                               | C-COO <sup>-</sup> stretching <sup>6</sup>             |                 |
| 1040                              | C-N stretching <sup>10</sup>                           |                 |
| 1173                              | NH <sub>3</sub> <sup>+</sup> deformation <sup>15</sup> |                 |
| 1225                              | Combined N-H bending and C-N stretching <sup>6</sup>   |                 |
| 1245                              | Amide III vibration <sup>10</sup>                      |                 |
| 1324                              | CH <sub>2</sub> wagging <sup>6</sup>                   |                 |
| 1344                              | CH <sub>3</sub> symmetric deformation <sup>6</sup>     | Pyr             |
| 1481                              | CH <sub>3</sub> asymmetric bending <sup>12</sup>       | Pyr             |
| 1537                              | Amide II vibration <sup>4</sup>                        |                 |
| 1547                              | Indole vibration <sup>4, 7, 9, 16</sup>                | Trp             |
| 1579                              | COO <sup>-</sup> asymmetric stretching <sup>6</sup>    |                 |
| 1586                              | Amide II vibration <sup>10</sup>                       |                 |
| 1631                              | Amide I vibration <sup>10, 12</sup>                    |                 |
| 1657                              | Amide I vibration (NH <sub>2</sub> ) <sup>12</sup>     |                 |



**Table S4.** Observed vibrational bands with assignments in the SERS spectra of Angiotensin III shown in Figure 5c. Bands allowing identification of this peptide are highlighted in red.

| Peak Position (cm <sup>-1</sup> ) | Proposed Band Assignment                                                                          | AA Contribution |
|-----------------------------------|---------------------------------------------------------------------------------------------------|-----------------|
| 693                               | COO <sup>-</sup> deformation <sup>3</sup>                                                         |                 |
| 854                               | Fermi resonance between ring breathing and out-of-plane ring bending overtone <sup>4,5</sup>      | Tyr             |
| 912                               | C-COO <sup>-</sup> stretching <sup>6</sup>                                                        |                 |
| 958                               | C-C stretching <sup>12</sup>                                                                      |                 |
| 1204                              | Combined ring breathing and C <sub>β</sub> -C <sub>γ</sub> stretching <sup>7-9</sup>              | Tyr and Phe     |
| 1249                              | Amide III vibration <sup>10</sup>                                                                 |                 |
| 1288                              | Imidazole C-H in-plane bending <sup>17</sup>                                                      | Tyr             |
| 1444                              | CH <sub>2</sub> scissoring <sup>12</sup>                                                          | Arg             |
| 1482                              | Combined imidazole ring stretching and imidazole C <sub>1</sub> -H in-plane bending <sup>18</sup> | Tyr             |
| 1602                              | Ring C-C stretching <sup>10</sup>                                                                 | Phe             |
| 1631                              | Amide I vibration <sup>10,12</sup>                                                                |                 |

**Table S5.** Observed vibrational bands with assignments in the SERS spectra of Somatostatin shown in Figure 5d. Bands allowing identification of this peptide are highlighted in red.

| Peak Position (cm <sup>-1</sup> ) | Proposed Band Assignment                              | AA Contribution |
|-----------------------------------|-------------------------------------------------------|-----------------|
| 674                               | C-S stretching <sup>13, 14</sup>                      | Cys-Cys         |
| 693                               | COO <sup>-</sup> deformation <sup>3</sup>             |                 |
| 1256                              | Amide III vibration <sup>10</sup>                     |                 |
| 1344                              | CH <sub>3</sub> symmetric deformation <sup>6</sup>    | Ala             |
| 1378                              | CH <sub>2</sub> scissoring <sup>11</sup>              |                 |
| 1454                              | CH <sub>2</sub> scissoring <sup>12</sup>              |                 |
| 1520                              | NH <sub>3</sub> <sup>+</sup> deformation <sup>6</sup> |                 |
| 1534                              | Amide II vibration <sup>4</sup>                       |                 |
| 1547                              | Indole vibration <sup>4, 7, 9, 16</sup>               | Trp             |
| 1602                              | Ring C-C stretching <sup>10</sup>                     | Phe             |
| 1631                              | Amide I vibration <sup>10, 12</sup>                   |                 |

**Table S6.** Observed vibrational bands with assignments in the SERS spectra of Amyloid  $\beta$ -Protein shown in Figure 5e. Bands allowing identification of this peptide are highlighted in red.

| Peak Position (cm <sup>-1</sup> ) | Proposed Band Assignment                               | AA Contribution |
|-----------------------------------|--------------------------------------------------------|-----------------|
| 674                               | C-S stretching <sup>13, 14</sup>                       | Met             |
| 962                               | C-C stretching <sup>12</sup>                           |                 |
| 1180                              | NH <sub>3</sub> <sup>+</sup> deformation <sup>15</sup> |                 |
| 1290                              | CH <sub>2</sub> wagging <sup>6</sup>                   |                 |
| 1458                              | CH <sub>2</sub> scissoring <sup>12</sup>               |                 |
| 1481                              | CH <sub>3</sub> asymmetric bending <sup>12</sup>       | Ile and Met     |
| 1514                              | NH <sub>3</sub> <sup>+</sup> deformation <sup>6</sup>  |                 |
| 1579                              | COO <sup>-</sup> asymmetric stretching <sup>6</sup>    |                 |
| 1586                              | Amide II vibration <sup>10</sup>                       |                 |
| 1631                              | Amide I vibration <sup>10, 12</sup>                    |                 |

**Table S7.** Observed vibrational bands with assignments in the SERS spectra of Angiotensin I shown in Figure 5f. Bands allowing identification of this peptide are highlighted in red.

| Peak Position (cm <sup>-1</sup> ) | Proposed Band Assignment                                                                                             | AA Contribution  |
|-----------------------------------|----------------------------------------------------------------------------------------------------------------------|------------------|
| 915                               | C-COO <sup>-</sup> stretching <sup>6</sup>                                                                           |                  |
| 948                               | C-C stretching <sup>12</sup>                                                                                         |                  |
| 1004                              | Symmetric ring breathing mode <sup>6, 10, 19</sup>                                                                   | Phe              |
| 1204                              | Combined ring breathing, C <sub>β</sub> -C <sub>γ</sub> stretching and imidazole ring deformation <sup>7-9, 18</sup> | Phe, Tyr and His |
| 1249                              | Amide III vibration <sup>10</sup>                                                                                    |                  |
| 1288                              | Imidazole C-H in-plane bending <sup>17</sup>                                                                         | Tyr and His      |
| 1344                              | CH <sub>3</sub> symmetric deformation <sup>6</sup>                                                                   | Leu              |
| 1482                              | Combined imidazole ring stretching and imidazole C <sub>1</sub> -H in-plane bending <sup>18</sup>                    | Tyr and His      |
| 1517                              | NH <sub>3</sub> <sup>+</sup> deformation <sup>6</sup>                                                                |                  |
| 1547                              | Amide II vibration <sup>4</sup>                                                                                      |                  |
| 1602                              | Ring C-C stretching <sup>10</sup>                                                                                    | Phe              |
| 1631                              | Amide I vibration <sup>10, 12</sup>                                                                                  |                  |

**Table S8.** Observed vibrational bands with assignments in the SERS spectra of Angiotensin II shown in Figure 5g. Bands allowing identification of this peptide are highlighted in red.

| Peak Position (cm <sup>-1</sup> ) | Proposed Band Assignment                                                                          | AA Contribution       |
|-----------------------------------|---------------------------------------------------------------------------------------------------|-----------------------|
| 622                               | COO <sup>-</sup> deformation <sup>12</sup>                                                        |                       |
| 693                               | COO <sup>-</sup> deformation <sup>3</sup>                                                         |                       |
| 915                               | C-COO <sup>-</sup> stretching <sup>6</sup>                                                        |                       |
| 948                               | C-C stretching <sup>12</sup>                                                                      |                       |
| 1004                              | Symmetric ring breathing mode <sup>6, 10, 19</sup>                                                | Phe                   |
| 1225                              | Combined N-H bending and C-N stretching                                                           |                       |
| 1249                              | Amide III vibration <sup>10</sup>                                                                 |                       |
| 1288                              | Imidazole C-H in-plane bending <sup>17</sup>                                                      | Tyr and His           |
| 1327                              | CH deformation <sup>6</sup>                                                                       | Phe                   |
| 1361                              | CH <sub>2</sub> scissoring <sup>11</sup>                                                          | Phe, Pro, Asp and Arg |
| 1482                              | Combined imidazole ring stretching and imidazole C <sub>1</sub> -H in-plane bending <sup>18</sup> | Tyr and His           |
| 1534                              | Amide II vibration <sup>4</sup>                                                                   |                       |
| 1573                              | COO <sup>-</sup> asymmetric stretching <sup>6</sup>                                               |                       |
| 1602                              | Ring C-C stretching <sup>10</sup>                                                                 | Phe                   |
| 1631                              | Amide I vibration <sup>10, 12</sup>                                                               |                       |

**Table S9.** Observed vibrational bands with assignments in the SERS spectra of Substance P shown in Figure 5h. Bands allowing identification of this peptide are highlighted in red.

| Peak Position (cm <sup>-1</sup> ) | Proposed Band Assignment                               | AA Contribution |
|-----------------------------------|--------------------------------------------------------|-----------------|
| 947                               | C-C stretching <sup>12</sup>                           |                 |
| 1004                              | Symmetric ring breathing mode <sup>6, 10, 19</sup>     | Phe             |
| 1135                              | NH <sub>3</sub> <sup>+</sup> deformation <sup>6</sup>  |                 |
| 1170                              | NH <sub>3</sub> <sup>+</sup> deformation <sup>15</sup> |                 |
| 1269                              | Amide III vibration <sup>10</sup>                      |                 |
| 1327                              | CH deformation <sup>6</sup>                            | Phe             |
| 1344                              | CH <sub>3</sub> symmetric deformation <sup>6</sup>     | Met             |
| 1361                              | CH <sub>2</sub> scissoring <sup>11</sup>               | Arg and Met     |
| 1484                              | CH <sub>3</sub> asymmetric bending <sup>12</sup>       | Arg and Met     |
| 1527                              | Amide II vibration <sup>4</sup>                        |                 |
| 1602                              | Ring C-C stretching <sup>10</sup>                      | Phe             |
| 1631                              | Amide I vibration <sup>10, 12</sup>                    |                 |

## References

1. R. Wojcik, O. O. Dada, M. Sadilek and N. J. Dovichi, *Rapid Communications in Mass Spectrometry*, 2010, 24, 2554-2560.
2. M. Larsson and E. S. M. Lutz, *Electrophoresis*, 2000, 21, 2859-2865.
3. J. S. Suh and M. Moskovits, *Journal of the American Chemical Society*, 1986, 108, 4711-4718.
4. E. Smith and G. Dent, *Modern Raman Spectroscopy: A Practical Approach*, Wiley, 2005.
5. M. N. Siamwiza, R. C. Lord, M. C. Chen, T. Takamatsu, I. Harada, H. Matsuura and T. Shimanouchi, *Biochemistry*, 1975, 14, 4870-4876.
6. S. Stewart and P. M. Fredericks, *Spectrochimica Acta Part a-Molecular and Biomolecular Spectroscopy*, 1999, 55, 1641-1660.
7. R. P. Rava and T. G. Spiro, *Journal of the American Chemical Society*, 1984, 106, 4062-4064.
8. I. R. Nabiev, S. D. Trakhanov, E. S. Efremov, V. V. Marinyuk and R. M. Lasorenkomanevich, *Bioorganicheskaya Khimiya*, 1981, 7, 941-945.
9. F. Wei, D. M. Zhang, N. J. Halas and J. D. Hartgerink, *Journal of Physical Chemistry B*, 2008, 112, 9158-9164.
10. D. Naumann, *Applied Spectroscopy Reviews*, 2001, 36, 239-298.
11. N. B. D. Colthup, L. H.; Wiberly, S. E., *Introduction to Infrared and Raman Spectroscopy*, Academic Press: New York, 1990.
12. S. Stewart and P. M. Fredericks, *Spectrochimica Acta Part a-Molecular and Biomolecular Spectroscopy*, 1999, 55, 1615-1640.
13. M. Rycenga, J. M. McLellan and Y. N. Xia, *Chemical Physics Letters*, 2008, 463, 166-171.
14. T. Watanabe and H. Maeda, *Journal of Physical Chemistry*, 1989, 93, 3258-3260.
15. T. M. Herne, A. M. Ahern and R. L. Garrell, *Journal of the American Chemical Society*, 1991, 113, 846-854.
16. T. Miura, H. Takeuchi and I. Harada, *Biochemistry*, 1991, 30, 6074-6080.
17. H. Takeuchi, N. Watanabe, Y. Satoh and I. Harada, *Journal of Raman Spectroscopy*, 1989, 20, 233-237.
18. S. Martusevicius, G. Niaura, Z. Talaikyte and V. Razumas, *Vibrational Spectroscopy*, 1996, 10, 271-280.
19. E. Podstawka, Y. Ozaki and L. M. Proniewicz, *Applied Spectroscopy*, 2004, 58, 570-580.
